# Supplementary material for: Reliability of the Turkish version of the European Obstructive Sleep Apnea Screening (EUROSAS) questionnaire for drivers
Source: Springer Nature journal article supplement (doi:10.1007/s11325-020-02201-2), 2020-10-08
Supplement: MOESM2 [file 18463258]

# The Turkish Version of the EUROSAS Questionnaire

## First Test

- 1) Cinsiyet: 1. K 2. E
- 2) Doğum yılı: .....
- 3) Boyunuz: ..... cm
- 4) Kilonuz: .....kg

|                                                                                                                                                |      |       |            |
|------------------------------------------------------------------------------------------------------------------------------------------------|------|-------|------------|
| 5) Siz hiç araba kullanırken uyuklar gibi oldunuz mu?                                                                                          | EVET | HAYIR | BİLMİYORUM |
| 6) Son 3 yıl içinde, uyuklama hali nedeniyle, taşıt kullanırken, kişi ya da araç hasarına neden olan herhangi bir trafik kazası geçirdiniz mi? | EVET | HAYIR | BİLMİYORUM |
| 7) Hemen her gece yüksek sesle horlar mısınız?                                                                                                 | EVET | HAYIR | BİLMİYORUM |
| 8) Uykudayken nefesinizin durduğunu söylüyorlar mı?                                                                                            | EVET | HAYIR | BİLMİYORUM |
| 9) Genellikle, gece uyuduktan sonra sabah uyandıığınızda kendinizi dinç/zinde/dinlenmiş hisseder misiniz?                                      | EVET | HAYIR | BİLMİYORUM |
| 10) Yüksek tansiyonunuz olduğu söylendi mi?                                                                                                    | EVET | HAYIR | BİLMİYORUM |

Aşağıdaki durumlarda sadece yorgun hissediyor olmaya göre, uyuklamaya ya da uykuya dalmaya ne kadar eğilimlisiniz?

- 0 = Hiç  
1 = Hafif derecede  
2 = Orta derecede  
3 = İleri derecede

| Durum                                                                                  | Uyuklama İhtimali (0-3) |
|----------------------------------------------------------------------------------------|-------------------------|
| Otururken ve okurken                                                                   |                         |
| Televizyon seyredirken                                                                 |                         |
| Umumi bir yerde (örn: sinema, tiyatro ya da bir toplantıda) bir şey yapmadan otururken |                         |
| Bir arabada bir saat boyunca ara vermeden yolcu olarak bulunurken                      |                         |
| Öğleden sonra koşullar izin verdiğinde dinlenmek için uzanırken                        |                         |
| Biriyle oturup konuşurken                                                              |                         |
| (Alkol almadığınız) Bir öğle yemeği sonrası sessizce otururken                         |                         |
| Bir arabada, trafikte birkaç dakika duruyorken                                         |                         |

## The Turkish Version of the EUROSAS Questionnaire

### Retest

- 1) Cinsiyet: 1. K 2. E
- 2) Doğum yılı: .....
- 3) Boyunuz: .....cm
- 4) Kilonuz: .....kg

|                                                                                                                      |      |       |            |
|----------------------------------------------------------------------------------------------------------------------|------|-------|------------|
| 5) Hiç araba kullanırken uyukladığınız oldu mu?                                                                      | EVET | HAYIR | BİLMİYORUM |
| 6) Geçen 3 yıl içerisinde, araba kullanırken uyukladığınız için kaza yapıp kişilere veya araçlara zarar verdiniz mi? | EVET | HAYIR | BİLMİYORUM |
| 7) Hemen her gece horlar mısınız?                                                                                    | EVET | HAYIR | BİLMİYORUM |
| 8) Size uykuda nefesinizin durduğunu söyleyen oldu mu?                                                               | EVET | HAYIR | BİLMİYORUM |
| 9) Sabahları genellikle dinlenmiş ve canlı olarak mı kalkarsınız?                                                    | EVET | HAYIR | BİLMİYORUM |
| 10) Yüksek tansiyonunuz var mı?                                                                                      | EVET | HAYIR | BİLMİYORUM |

Aşağıda belirtilen durumlarda uyuklama veya uyuyakalma durumunuz nedir? Yanıt verirken size en uygun seçeneği belirleyiniz:

- 0 = Hiç  
1 = Biraz  
2 = Orta derecede  
3 = Çok

| Durum                                                          | Uyuklama/uyuyakalma (0-3) |
|----------------------------------------------------------------|---------------------------|
| Otururken ve okurken                                           |                           |
| TV izlerken                                                    |                           |
| Sinema, tiyatro gibi bir yerde otururken                       |                           |
| 1 saatlik bir araba yolculuğunda, yolcu olarak seyahat ederken |                           |
| Öğlen yemeğinden sonra uygun ortam varsa, uzanmış dinlenirken  |                           |
| Birisiyle konuşurken                                           |                           |
| Alkolsüz bir öğlen yemeğinden sonra sessizce otururken         |                           |
| Arabada, trafikte beklerken                                    |                           |
